# Supplementary material
Source: bioRxiv or medRxiv preprint supplement (https://medrxiv.org/highwire/filestream/81352/field_highwire_adjunct_files/1/2020.05.15.20102608-2.pdf)
Supplement: Supplementary file [file 2020.05.15.20102608-2.pdf]

# Fusing a Bayesian case velocity model with random forest for predicting COVID-19 in the U.S.: Supplemental material

Gregory L. Watson<sup>1</sup>, Di Xiong<sup>1</sup>, Lu Zhang<sup>1</sup>, Joseph A. Zoller<sup>1</sup>, John Shamshoian<sup>1</sup>, Phillip Sundin<sup>1</sup>, Teresa Bufford<sup>1</sup>, Anne W. Rimoin<sup>2</sup>, Marc A. Suchard<sup>1,3</sup>, Christina M. Ramirez<sup>1</sup>

**1** Department of Biostatistics, Fielding School of Public Health, University of California, Los Angeles, California, United States of America

**2** Department of Epidemiology, Fielding School of Public Health, University of California, Los Angeles, California, United States of America

**3** Departments of Biomathematics and Human Genetics, David Geffen School of Medicine, University of California, Los Angeles, California, United States of America

## Parameter Values and Prior Distributions

Table 1 lists parameters for the various components of the model and gives their values or distributions. The  $\rho$  parameter governs flow out of the I compartment of the SIRD model. Its inverse,  $\rho^{-1}$ , is interpreted as the expected amount of time until an infected individual recovers or dies.

**Table 1. Parameter Values & Distributions**

| Model         | Parameter         | Value/Distribution |
|---------------|-------------------|--------------------|
| SIRD          | $\rho^{-1}$       | $N(14, 1)$         |
| Mixed Model   | $\mu_\alpha$      | $N(-1, 1)$         |
| Mixed Model   | $\mu_\beta$       | $N(0, 0.1)$        |
| Mixed Model   | $\mu_\gamma$      | $N(0, 1)$          |
| Mixed Model   | $\mu_\delta$      | $N(-0.05, 0.1)$    |
| Mixed Model   | $\mu_\eta$        | $N(0, 1)$          |
| Mixed Model   | $\mu_\zeta$       | $N(0, 0.1)$        |
| Mixed Model   | $\sigma_\alpha^2$ | 1                  |
| Mixed Model   | $\sigma_\beta^2$  | 0.1                |
| Mixed Model   | $\sigma_\gamma^2$ | 1                  |
| Mixed Model   | $\sigma_\delta^2$ | 0.1                |
| Mixed Model   | $\sigma_\eta^2$   | 1                  |
| Mixed Model   | $\sigma_\zeta^2$  | 0.1                |
| Mixed Model   | <b>n.chains</b>   | 3                  |
| Mixed Model   | <b>n.iter</b>     | 500,000            |
| Mixed Model   | <b>n.burnin</b>   | 10,000             |
| Mixed Model   | <b>n.thin</b>     | 500                |
| Random Forest | <b>ntree</b>      | 500                |
| Random Forest | <b>mtry</b>       | 9                  |
| Random Forest | <b>nodesize</b>   | 5                  |

Values or prior distributions for the parameters of each component of the model.
